# Supplementary material
Source: PubMed Central journal article supplement (PMC6948857)
Supplement: jciinsight-4-129013-s044.pdf [file jciinsight-4-129013-s044.pdf]

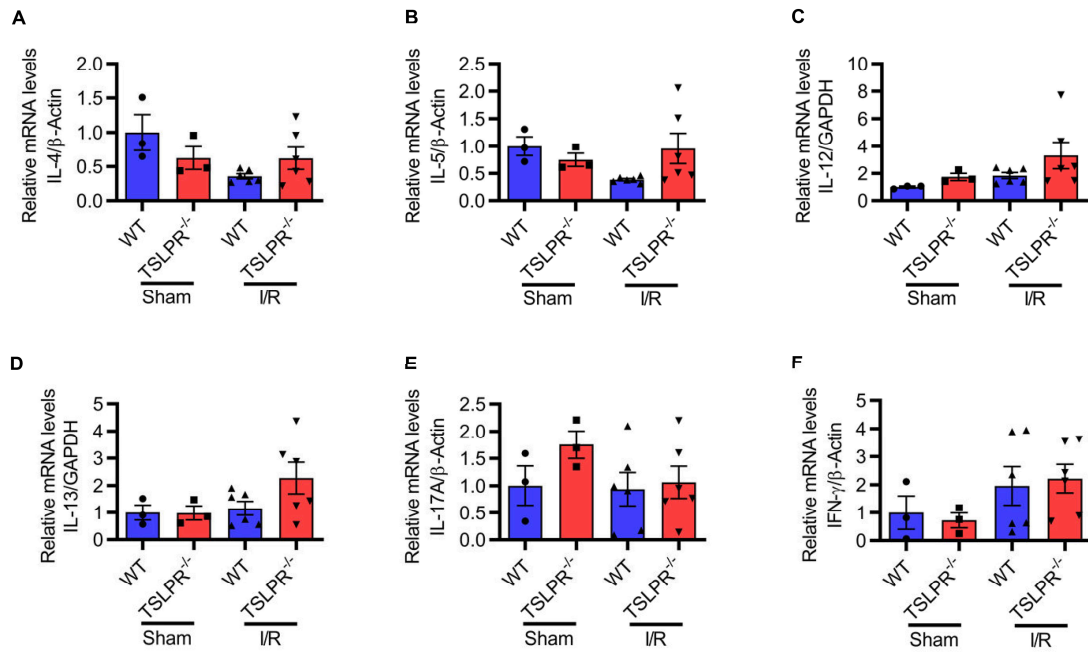

**Supplemental figure 1. Cytokines expression in liver tissues after liver I/R injury.** Cytokines production were assessed by qRT-PCR in liver tissues from WT mice and TSLPR<sup>-/-</sup> mice in sham or I/R (Ischemia for 1 hr, Reperfusion for 6 hrs) groups.  $\beta$ -Actin or GAPDH served as a control. n=3 in sham groups, n=6 in liver I/R groups. All data are showed as the mean  $\pm$ SE. *P* values by unpaired, 2-tailed student's *t* test (A, B, C, D, E, F). Results are expressed as the relative fold increase from three experiments compared with control.

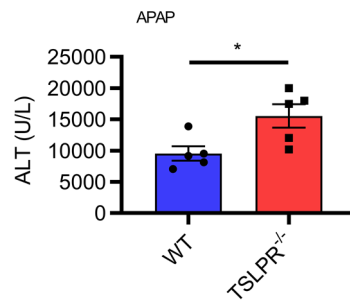

**Supplemental figure 2. TSLP protects against acetaminophen (APAP)-induced liver injury.** WT and TSLPR<sup>-/-</sup> mice were subjected to fasting with free access to water for 16 hrs before APAP treatment. APAP (400mg/kg) was administered by i.p. and the mice were observed for 6 hrs. \* $p < 0.05$  by unpaired, 2-tailed student's  $t$  test.  $n = 5$  per group.
